1 **Title:** Experience-dependent modulation of the visual evoked potential: testing effect  
2 sizes, retention over time, and associations with age in 415 healthy individuals

3  
4 **Authors:** Mathias Valstad<sup>1</sup>, Torgeir Moberget<sup>1,2</sup>, Daniël Roelfs<sup>1</sup>, Nora B. Slapø<sup>1</sup>,  
5 Clara M.F. Timpe<sup>1,2</sup>, Dani Beck<sup>1,2</sup>, Geneviève Richard<sup>1</sup>, Linn Sofie Sæther<sup>1</sup>, Beathe  
6 Haatveit<sup>1</sup>, Knut Andre Skaug<sup>1,3</sup>, Jan Egil Nordvik<sup>4</sup>, Christoffer Hatlestad-Hall<sup>2,5</sup>, Gaute  
7 T. Einevoll<sup>6,7</sup>, Tuomo Mäki-Marttunen<sup>1,8</sup>, Lars T. Westlye<sup>1,2</sup>, Erik G. Jönsson<sup>1,9</sup>, Ole A.  
8 Andreassen<sup>1</sup>, Torbjørn Elvsåshagen<sup>1,5</sup>

9  
10 **Author affiliations:** <sup>1</sup>NORMENT, Division of Mental Health and Addiction, Oslo

11 University Hospital & Institute of Clinical Medicine, University of Oslo, Norway,

12 <sup>2</sup>Department of Psychology, University of Oslo, Oslo, Norway,

13 <sup>3</sup>MentisCura, Reykjavik, Iceland, <sup>4</sup>CatoSenteret Rehabilitation Center, Son, Norway,

14 <sup>5</sup>Department of Neurology, Oslo University Hospital, Oslo, Norway, <sup>6</sup>Faculty of

15 Science and Technology, Norwegian University of Life Sciences, Ås, Norway,

16 <sup>7</sup>Department of Physics, University of Oslo, Oslo, Norway, <sup>8</sup>Simula Research

17 Laboratory, Oslo, Norway, <sup>9</sup>Department of Clinical Neuroscience, Centre for

18 Psychiatric Research, Karolinska Institutet, Stockholm, Sweden

19

20 **Acknowledgments:** This study was funded by the Research Council of Norway, the

21 South-Eastern Norway Regional Health Authority, Oslo University Hospital and a

22 research grant from Mrs. Throne-Holst. The authors report no biomedical financial

23 interests or potential conflicts of interest.

24

25 **Corresponding authors:** Mathias Valstad & Torbjørn Elvsåshagen.

26 E-mails: [mathias.valstad@medisin.uio.no](mailto:mathias.valstad@medisin.uio.no); [torbjorn.elvsashagen@medisin.uio.no](mailto:torbjorn.elvsashagen@medisin.uio.no)

27 Postal address: Norwegian Centre for Mental Disorders Research, Oslo University

28 Hospital, PoBox 4956 Nydalen, Norway.

29 **Abstract**

30 Experience-dependent modulation of the visual evoked potential (VEP) is a  
31 promising proxy measure of synaptic plasticity in the cerebral cortex. However,  
32 existing studies are limited by small to moderate sample sizes as well as by  
33 considerable variability in how VEP modulation is quantified. In the present study, we  
34 used a large sample ( $n = 415$ ) of healthy volunteers to compare different  
35 quantifications of VEP modulation with regards to effect sizes and retention of the  
36 modulation effect over time. We observed significant modulation for VEP  
37 components C1 (Cohen's  $d = 0.53$ ), P1 ( $d = 0.66$ ), N1 ( $d = -0.27$ ), N1b ( $d = -0.66$ ),  
38 but not P2 ( $p = 0.1$ ), and in one time-frequency cluster ( $\sim 30$  Hz and  $\sim 70$  ms post-  
39 stimulus;  $d = -0.48$ ), 2-4 minutes after 2 Hz prolonged visual stimulation. For  
40 components N1 ( $d = -0.21$ ) and N1b ( $d = -0.38$ ), as well for the time-frequency cluster  
41 ( $d = -0.33$ ), this effect was retained after 54-56 minutes. Moderate to high  
42 correlations ( $\rho = [0.39, 0.69]$ ) between modulation at different postintervention blocks  
43 revealed a relatively high temporal stability in the modulation effect for each VEP  
44 component. However, different VEP components also showed markedly different  
45 temporal retention patterns. Finally, P1 modulation correlated positively with age ( $t =$   
46  $5.26$ ), and was larger for female participants ( $t = 3.91$ ), with no effects of either age or  
47 sex on N1 and N1b potentiation. These results provide strong support for VEP  
48 modulation, and especially N1b modulation, as a robust measure of synaptic  
49 plasticity, but underscore the need to differentiate between components, and to  
50 control for demographic confounders.

## 51 **Introduction**

52 Due to the essential role of synaptic plasticity in learning and memory (Takeuchi,  
53 Duzskiewicz, & Morris, 2013), as well as its likely role in the etiology of a range of  
54 psychiatric disorders (Consortium, 2014; Stephan, Baldeweg, & Friston, 2006),  
55 several non-invasive methodologies for studying long term potentiation (LTP)-like  
56 synaptic plasticity in humans have been developed. Among these approaches, the  
57 application of high frequency or prolonged visual stimulation to manipulate visual  
58 evoked potentials (VEPs) measured using electroencephalography (EEG) has  
59 proven especially promising (Cooke & Bear, 2012). Supporting the utility of this  
60 experimental paradigm in clinical research, modulation of VEP components after high  
61 frequency or prolonged visual stimulation appears to be altered in mood  
62 (Elvsåshagen et al., 2012; Normann, Schmitz, Fürmaier, Döing, & Bach, 2007) and  
63 psychotic illnesses (Çavuş et al., 2012). However, the specific VEP components  
64 exhibiting robust modulation effects and differences between patients and controls,  
65 as well as the retention of modulation effects, have varied between studies,  
66 highlighting a need for further characterization of VEP modulation induced by  
67 prolonged visual stimulation in a large sample of healthy individuals.

68

69 In a standard VEP modulation paradigm, subjects are exposed first to reversing  
70 checkerboard or grating stimuli which elicit VEPs, then to a prolonged (e.g. Normann  
71 et al., 2007) or high-frequency version (e.g. Teyler et al., 2005) of the same stimulus,  
72 and lastly, after some delay, to the initial stimulation again, which now typically  
73 evokes a slightly modulated visual potential. Importantly, the mechanisms underlying  
74 such experience-dependent VEP modulation seem to share many characteristics  
75 with LTP, thus having earned the placeholder epithet *LTP-like plasticity*. In mice, both

76 NMDAR antagonists like CPP, and AMPAR insertion-inhibitor GluR1-CT prevent  
77 experience-dependent VEP modulation from occurring (Frenkel et al., 2006). Also,  
78 electrical stimulation-induced LTP at thalamocortical synapses in the primary visual  
79 cortex (V1) enhances visual evoked potentials and inhibits further experience-  
80 dependent VEP modulation (Cooke & Bear, 2012). In humans, the spatial frequency-  
81 and orientation-specific receptive fields of V1 neurons have been exploited to  
82 demonstrate a specificity of experience-dependent VEP modulation that is consistent  
83 with the synaptic specificity characteristic of LTP (McNair et al., 2006; Ross et al.,  
84 2008).

85  
86 Although all published studies have reported experience-dependent VEP modulation,  
87 the exact components modulated and the duration of modulation have varied  
88 between experiments (Table 1). In humans, the VEP is characterized by components  
89 separated in time, voltage polarity, and likely neural generators, with the largely  
90 negative C1 probably originating in the primary visual cortex (Di Russo, Martínez,  
91 Sereno, Pitzalis, & Hillyard, 2002) and occurring at ~50-90 ms post-stimulus, the  
92 positive P1 at ~80-120 ms and the negative N1 at ~130-200 ms, both probably  
93 originating in striate and extrastriate areas (Di Russo et al., 2002), and the positive  
94 and likely very complex P2 at ~200-300 ms post-stimulus. While some researchers  
95 (McNair et al., 2006; Ross et al., 2008; Teyler et al., 2005) demonstrated modulation  
96 of the relatively late-occurring N1b component exclusively, others have demonstrated  
97 an effect that is earlier and more widespread, with modulation of the P1 and N1  
98 components (Elvsåshagen et al., 2012), and even of the C1 component (Çavuş et al.,  
99 2012; Normann et al., 2007). However, in the two studies demonstrating C1  
100 modulation, opposite directions of effect were observed. The duration of VEP

101 modulation has also varied between studies. Among the studies measuring VEP  
102 within the time range of classical LTP, that is, at least 30 minutes (Lisman, 2017)  
103 after prolonged or high frequency visual stimulation, one demonstrated retention of  
104 the modulation (Teyler et al., 2005), while another did not (Ross et al., 2008). Thus, it  
105 is also unclear to which extent early (< 30 minutes after high frequency or prolonged  
106 stimulation) and late (> 30 minutes after high frequency or prolonged stimulation)  
107 VEP modulation are associated, such that early VEP modulation could be taken as  
108 indicative of late. While some of the observed differences may be attributable to  
109 variations in experiment characteristics such as the specific visual stimulus used  
110 (grating or checkerboard), as well as the duration and frequency of stimulation,  
111 heterogeneity of results between studies that are similar in these respects seems to  
112 implicate error variance.

113

114 Indeed, some of the studies at hand may have been underpowered with respect to  
115 differentiation between modulation of separate VEP components, and may not have  
116 controlled for adequate confounders. Potential confounders of the VEP modulation  
117 effect include the age and sex of participants. With age, there is a general decline in  
118 neural plasticity in animals (Burke & Barnes, 2006). Using the VEP modulation  
119 paradigm in humans, visual cortical plasticity has been demonstrated in older  
120 individuals in one sample (de Gobbi-Porto et al., 2015), but not in another (Spriggs,  
121 Cadwallader, Hamm, Tippett, & Kirk, 2017), and the relationship could be further  
122 elucidated with a continuous age distribution among participants. Further, sex  
123 differences in anatomical features such as cortical gyrification (Luders et al., 2004)  
124 might impact orientation of neural tissue, electrical conduction, and ultimately scalp  
125 EEG signals. Another factor that could impact observed VEP modulation is the level

126 of attention afforded the visual stimulus, especially during high frequency or  
127 prolonged visual stimulation. Attention levels might be indexed by visual stimulation-  
128 driven steady state responses (Çavuş et al., 2012), or inversely by power in the alpha  
129 range (8-13 Hz) (Liu, Chiang, & Chu, 2013). The impact of such potential  
130 confounders should be further characterized to adequately evaluate effects of high  
131 frequency or prolonged visual stimulation in different populations.

132

133 There are multiple ways of quantifying VEP modulation, potentially leading to  
134 questionable analytic flexibility if the outcome is not defined a priori. For instance,  
135 while some researchers have focused on the N1b component of the VEP, which is  
136 typically operationalized as mean amplitude between the first negative and halfway to  
137 the first positive peak after P1 (e.g. McNair et al., 2006; Spriggs et al., 2017), others  
138 have focused on the N1 component, operationalized as the amplitude of the first  
139 negative peak after P1 (Elvsåshagen et al., 2012). Quantifications of VEP modulation  
140 to consider include changes from baseline to postintervention amplitudes in the C1,  
141 P1, N1, N1b, and P2 components, as well as in the peak to peak difference P1-N1.  
142 Furthermore, as the largest effects are not necessarily phase-locked, time-frequency  
143 analyses of the post-stimulus EEG should be employed to complement time-domain  
144 analyses. Since these components have not been directly compared in a large  
145 sample of healthy individuals, it is currently unknown which of the many potential  
146 indices of LTP-like synaptic plasticity is most sensitive and robust. Typical sample  
147 sizes within the field might make some studies vulnerable to winner's curse and  
148 random effects (Ioannidis, 2008). Here, we conducted the largest study of VEP  
149 modulation to date in 415 healthy volunteers and directly compared several  
150 quantifications of VEP modulation, enabling us to obtain realistic effect sizes and to

151 determine which quantifications are best suited for indexing LTP-like synaptic  
152 plasticity in humans.

153

154 The present study had three main aims: first, to determine which EEG measures  
155 exhibit robust modulation following prolonged visual stimulation; second, to assess  
156 the retention of such VEP modulation effects over intervals reaching the time range  
157 of LTP, and the correlations between the magnitude of early and late VEP  
158 modulation; and third, to examine the extent to which age, sex, and markers of  
159 attention might influence VEP modulation.

160 **Methods**

161 *Participants.* 415 participants (age range: 18-88, 59% female) were recruited to this  
162 study from Statistics Norway and announcements in national news outlets, and  
163 included after screening for self-reported neurological or psychiatric disease. All  
164 participants had normal or corrected-to-normal vision. The experiment was approved  
165 by the Regional Ethical Committee of South-Eastern Norway, and all participants  
166 provided written informed consent.

167

168 *Experimental procedures.* The VEP modulation paradigm was adopted from  
169 Normann et al. (2007). Over a period of 67 minutes, 11 VEP blocks, i.e., 2 baseline  
170 blocks, 1 intervention block of prolonged visual stimulation, and 8 postintervention  
171 blocks, were presented on a 24 inch 144Hz AOC LCD screen with 1 ms grey-to-grey  
172 response time (Fig. 1). All blocks, including the intervention block, consisted of a  
173 reversing checkerboard pattern with a spatial frequency of 1 cycle/degree over a  
174  $\sim 28^\circ$  visual angle. The reversal frequency was fixed at 2 reversals per second for the  
175 intervention block, whereas the baseline and postintervention blocks had jittered  
176 stimulus onset asynchronies of 500-1500 ms (mean = 1000 ms). All baseline and  
177 postintervention blocks lasted  $\sim 40$  seconds (i.e., 40 checkerboard reversals), while  
178 the stimulation block lasted 10 minutes (i.e., 1200 reversals). Postintervention blocks  
179 were presented at 2 min, 3 min 40 s, 6 min 20 s, 8 min,  $\sim 30$  min,  $\sim 32$  min,  $\sim 54$  min,  
180 and  $\sim 56$  min after the intervention block. Through all blocks, the participants fixed  
181 their gaze on a red dot in the centre of the screen, and pressed a key on a gaming  
182 controller when its color changed from red to green. Between the seventh and eight,  
183 and between the ninth and tenth blocks, participants underwent mismatch negativity



184 (Näätänen, Gaillard, & Mäntysalo, 1978) and prepulse inhibition (Graham & Murray,  
185 1977) tasks, respectively.

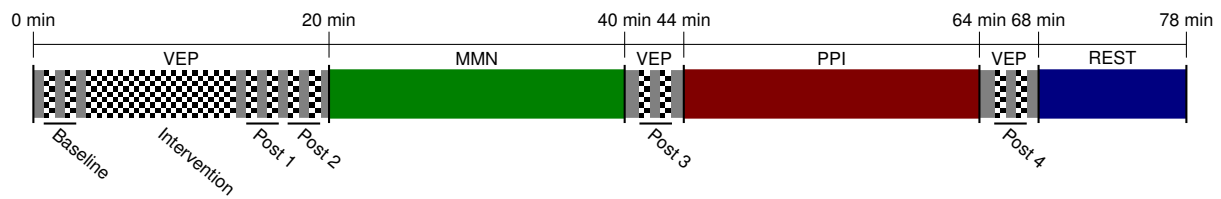

186

187 **Figure 1.** Experimental timeline. **VEP:** visual evoked potential paradigm, **MMN:** mismatch negativity  
188 paradigm, **PPI:** prepulse inhibition paradigm, **REST:** resting state EEG.  
189

190 *Data acquisition.* EEG recordings were acquired using a 64 channel BioSemi  
191 ActiveTwo amplifier, with Ag-AgCl sintered electrodes distributed across the scalp  
192 according to the international 10-20 system. External electrodes were placed at the  
193 outer canthi of both eyes (LO1, LO2), and below and above the left eye (IO1, SO1) in  
194 order to acquire horizontal and vertical electro-oculograms for eye movement and  
195 eye blink correction. Potentials at electrode sites were measured with respect to a  
196 common mode sense, with a driven right leg electrode minimizing common mode  
197 voltages, and sampled at 2048 Hz.

198

199 *Signal processing.* Signal processing was performed using MATLAB and the  
200 EEGLAB toolbox for MATLAB (Delorme & Makeig, 2004), while statistical analysis  
201 was performed using R version 3.6.0 (R Core Team, 2019). Offline, files were  
202 downsampled to 512 Hz. Noisy channels were identified with PrepPipeline algorithms  
203 (Bigdely-Shamlo, Mullen, Kothe, Su, & Robbins, 2015) using default criteria, and  
204 removed. Remaining channels were first referenced to their common average  
205 voltage, before interpolation of removed channels from surrounding channel  
206 potentials, and finally all channels were rereferenced to the new common average  
207 after interpolation of bad channels. Data destined for time domain analysis were  
208 band-pass filtered between 0.1 and 40 Hz, while data for spectral analysis were high-

209 pass filtered at 0.1 Hz. A fixed 20 ms delay in the visual presentation relative to the  
210 event markers was detected using a BioSemi PIN diode placed in front of the screen  
211 while running the paradigm, and event markers were adjusted offline to account for  
212 this. Next, epochs were extracted at 200 ms pre- to 500 ms post-stimulus. Muscle,  
213 eye blink and eye movement artifactual components were removed with SASICA  
214 defaults (Chaumon, Bishop, & Busch, 2015) after subjecting the epoched data to  
215 independent component analyses with the SOBI algorithm (Belouchrani, Abed-  
216 Meraim, Cardoso, & Moulines, 1993). Finally, epochs with amplitude diversions  
217 exceeding 100  $\mu$ V were removed, and all channels were referenced to the AFz  
218 electrode.

219

220 *Data analysis.* Three different modes of EEG analysis were pursued: time domain  
221 analyses at group and individual levels, frequency domain analyses at the individual  
222 level, and time-frequency analyses at group and individual levels. Since the baseline  
223 consisted of two VEP blocks, postintervention blocks were also collapsed into series  
224 of two blocks for equal comparison, resulting in one baseline assessment and four  
225 postintervention assessments.

226

227 For time domain analysis, C1 was defined as minimum amplitude between 50-100  
228 ms post-stimulus, P1 as maximum amplitude between 80-140 ms, N1 as the  
229 amplitude of the first negative peak after P1, N1b as mean amplitude between the  
230 first negative and halfway to the first positive peak after P1 (effectively 150-190 ms  
231 post-stimulus), and P2 as mean amplitude in the 50 ms after and including the first  
232 positive peak after P1 (effectively 228-278 ms post-stimulus), reflecting increased  
233 latency variabilities with later components. C1 identification was quality controlled by

234 visual inspection, and analyses were run with and without corrected data. In addition,  
235 we performed a completely data-driven, exploratory analysis, where voltages at each  
236 post-stimulus time point were calculated and assessed for postintervention changes.  
237 All channels were subjected to group-level time domain analysis, and the channel  
238 with highest amplitudes and most pronounced VEP modulation (i.e., Oz) was  
239 selected for all later analyses (Fig. 3).

240

241 For frequency domain analyses, entire continuous stretches of intervention block  
242 EEG were subjected to a Fast Fourier Transform (Cohen, 2014) before extraction of  
243 mean power within the alpha (8-13 Hz) and narrow steady state bands centered on  
244 the 2 Hz visual stimulation frequency (1.8-2.2 Hz).

245

246 For time-frequency analyses, high-pass filtered epochs from all participants were  
247 convolved with 5-cycle complex Morlet wavelets (Cohen, 2014) at each integer  
248 frequency between 10 and 120 Hz. To calculate induced power in addition to total  
249 power, each participant's ERP at each assessment was also convolved with the  
250 same complex Morlet wavelets, and the resulting inner products were subtracted  
251 from the inner products at corresponding times and frequencies for each epoch. For  
252 both total and induced spectra, median amplitudes of inner products at each time  
253 point and each frequency were computed across assessments, and were decibel  
254 converted with a baseline between 150 and 100 ms pre-stimulus. The resulting pixels  
255 (representing a specific time-frequency combination) were then permuted across  
256 baseline and the first postintervention assessment in 2000 simulations, generating a  
257 null distribution for each pixel. The decibel values for each time point and frequency  
258 were then permuted again, simulation pixels were thresholded at  $p < 0.05$  compared

259 to the pixel null distributions, and the size of the largest resulting cluster was stored  
260 to generate a null distribution of cluster sizes. Finally, the actual decibel values were  
261 thresholded at  $p < 0.0005$ , and resulting clusters larger than 0.9995 of the null  
262 clusters were selected for further analysis. At the individual participant level, average  
263 power within the resulting clusters was then extracted at all assessments.

264

265 *Outcomes.* Primary outcomes were i) modulation of components C1, P1, N1, N1b,  
266 and P2, as well as in the P1-N1 composite, between baseline and each  
267 postintervention assessment, ii) modulation of within time-frequency clusters total  
268 power between baseline and each postintervention assessment, and linear models  
269 for the effects of induced and evoked power for such differences, iii) correlations  
270 between baseline to postintervention amplitude changes for all components at all  
271 postintervention assessments, and iv) effects of age, gender, and steady-state and  
272 alpha band powers during prolonged visual stimulation on the subsequent  
273 modulation of components C1, P1, N1, N1b, and P2.

274

275 Raw values are reported along with standard errors, calculated as standard  
276 deviations over the square root of the sample size. Baseline to postintervention  
277 changes (i.e., modulation effects) are expressed as Cohen's  $d_z$  (henceforth denoted  
278  $d$ ), calculated as difference means over difference standard deviations (Cohen,  
279 1988), and as response rates (rr), defined as the proportion of participants exhibiting  
280 the expected direction of baseline to postintervention changes. Correlations are  
281 expressed as Spearman's  $\rho$ . P-values were calculated based on 20000 permutations  
282 between baseline and postintervention assessments, and are reported in their raw  
283 form. Alpha levels were adjusted to control for multiple comparisons according to the

284 effective number of independent comparisons, derived using eigenvalues of the  
285 correlation matrix of the entire continuous data set (Li & Ji, 2005), yielding an  
286 experiment-wide significance threshold at 0.0009. Regression models were fitted  
287 using the general linear model, while controlling for baseline amplitudes, model fit is  
288 indexed using Nagelkerke  $R^2$ , and effect is expressed with  $t$ -values.

289 **Results**

290 The checkerboard reversal stimulation evoked the expected C1, P1, N1, and P2  
291 components of the VEP (Fig. 2; see Table 2 for latencies and amplitudes). Initial  
292 group level analyses demonstrated that, across VEP components, the highest  
293 amplitudes and the largest modulation effects were exhibited at the occipital Oz  
294 electrode (Fig. 3A-B), which was accordingly selected for individual level analyses.

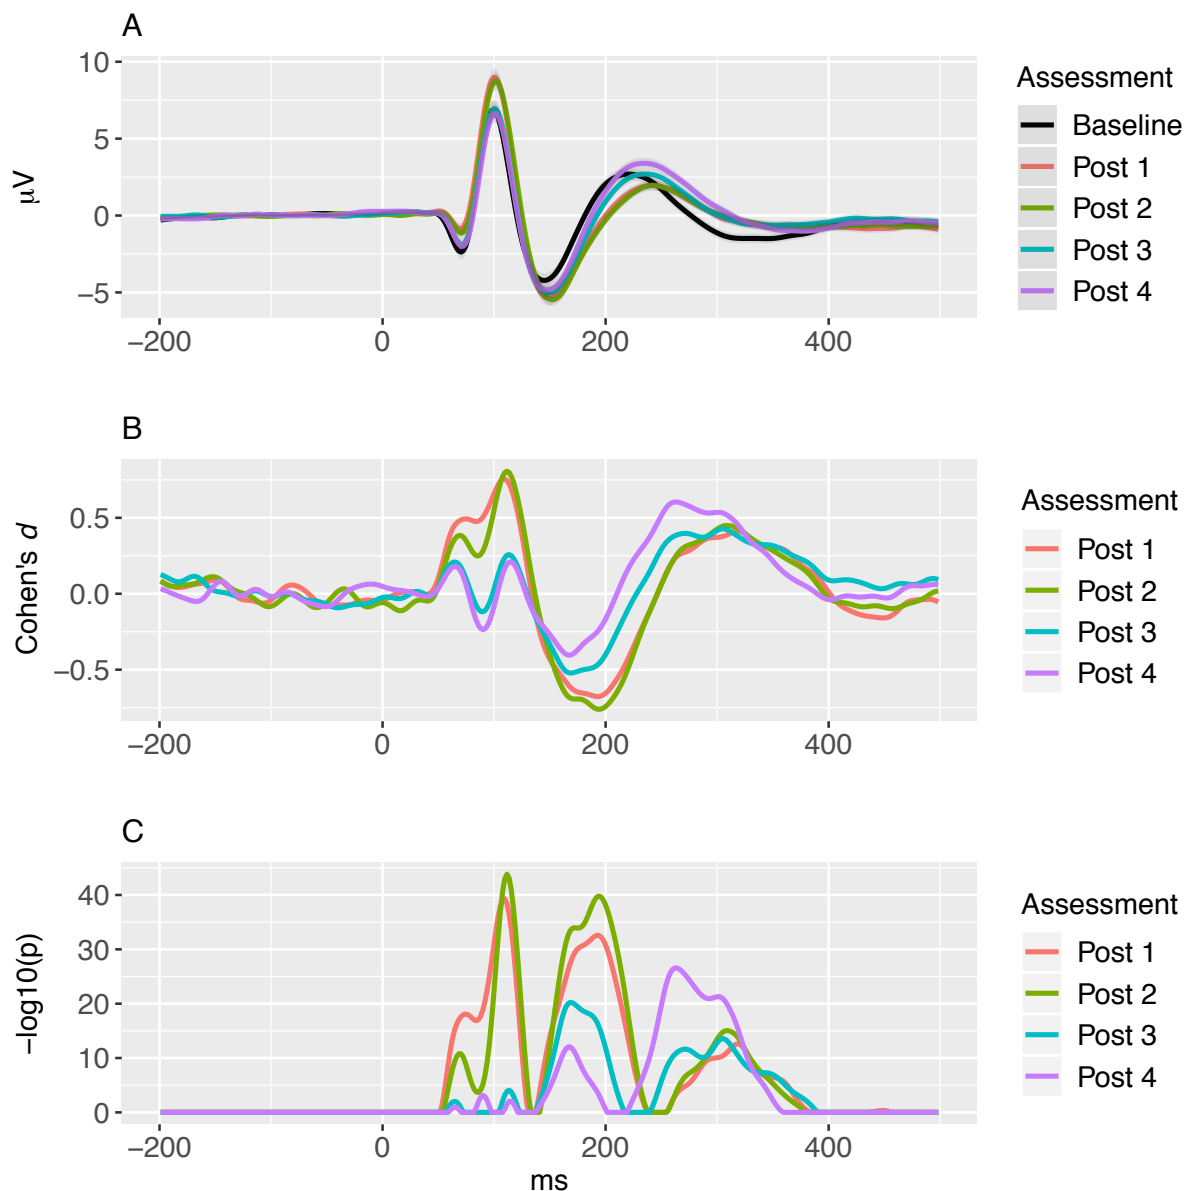

295

296 **Figure 2. A.** Grand average visual evoked potentials measured at the occiput (Oz) with anterior  
297 reference (AFz) at baseline, post 1 (2-4 min after prolonged visual stimulation), post 2 (6-8 min), post  
298 3 (30-32 min), and post 4 (54-56 min). **B.** Cohen's  $d$  from baseline VEP and the postintervention  
299 assessments. **C.** P-values for difference between baseline VEP the postintervention assessments,  
300 Bonferroni corrected and log transformed for visualization purposes.

301

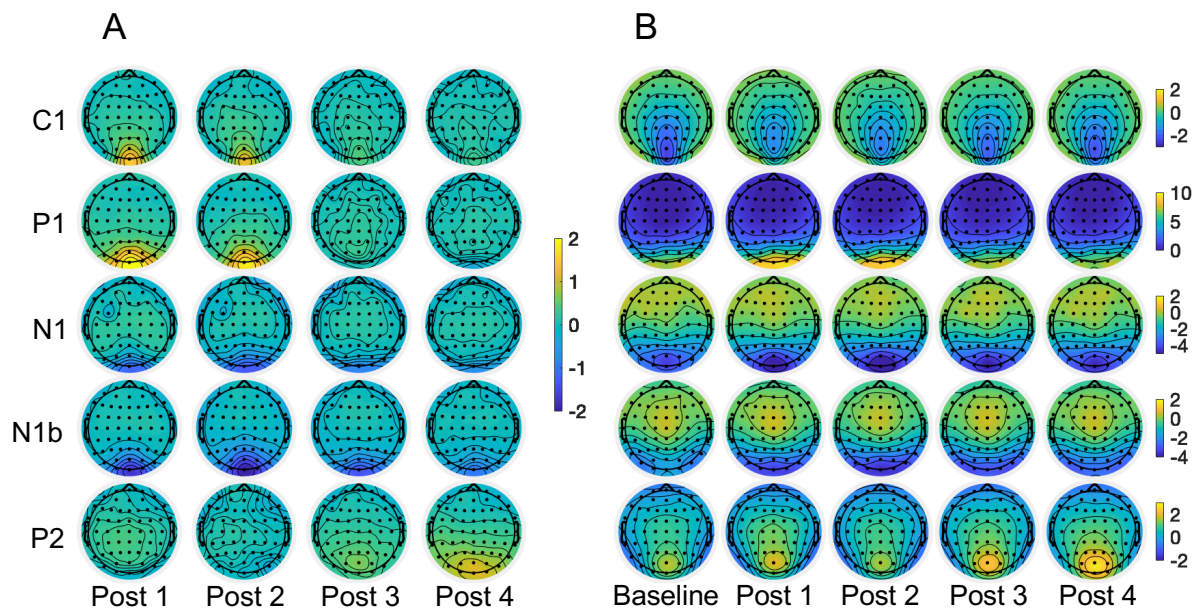

302

303 **Figure 3. A.** Scalp topographical distribution of C1, P1, N1, N1b, and P2 unscaled amplitude  
304 differences (in  $\mu\text{V}$ ) from baseline to postintervention assessments 1 (2-4 min after prolonged visual  
305 stimulation), 2 (6-8 min), 3 (30-32 min), and 4 (54-56 min). **B.** Scalp topographical distribution of C1,  
306 P1, N1, N1b, and P2 amplitudes at baseline and each of the postintervention assessments 1-4.  
307

308 When testing for modulation effects across all timepoints of the VEP at the first  
309 postintervention assessment after prolonged visual stimulation, significant changes at  
310 latencies of 54.7-128.9 ms, 138.7-234.4 ms, and 257.8-375.0 ms were observed  
311 (Fig. 2). Correspondingly, experience-dependent VEP modulation was apparent as  
312 amplitude changes from baseline to the first postintervention assessment for both the  
313 C1 ( $d = 0.53$ ,  $rr = 0.70$ ), P1 ( $d = 0.66$ ,  $rr = 0.76$ ), N1 ( $d = -0.27$ ,  $rr = 0.62$ ), N1b ( $d = -$   
314  $0.66$ ,  $rr = 0.77$ ), but not P2 ( $p = 0.1$ ,  $rr = 0.53$ ) components, with highly similar effects  
315 for both the C1 ( $d = 0.43$ ,  $rr = 0.67$ ), P1 ( $d = 0.55$ ,  $rr = 0.72$ ), N1 ( $d = -0.26$ ,  $rr = 0.61$ ),  
316 N1b ( $d = -0.71$ ,  $rr = 0.77$ ) and the P2 ( $p = 0.1$ ,  $rr = 0.54$ ) components at the  
317 immediately following second postintervention assessment. Some, but not all,  
318 changes after prolonged visual stimulation were retained at the third and fourth  
319 postintervention assessments. The C1 component retained modulation at the third ( $d$   
320  $= 0.20$ ,  $rr = 0.58$ ), and tendentially at the fourth ( $d = 0.16$ ,  $p = 0.001$ ,  $rr = 0.56$ )



321 postintervention assessment. The P1 component did not retain modulation at the  
322 third ( $p = 0.38$ ,  $rr = 0.54$ ), nor at the fourth ( $p = 0.22$ ,  $rr = 0.48$ ) postintervention  
323 assessment. The N1 component retained modulation at the third ( $d = -0.17$ ,  $rr =$   
324  $0.60$ ), and fourth ( $d = -0.21$ ,  $rr = 0.66$ ) postintervention assessment. The N1b  
325 component retained modulation at both the third ( $d = -0.53$ ,  $rr = 0.75$ ), and the fourth  
326 ( $d = -0.38$ ,  $rr = 0.68$ ) postintervention assessment. Finally, the P2 component gained  
327 modulation at the third ( $d = 0.30$ ,  $rr = 0.65$ ) and the fourth ( $d = 0.54$ ,  $rr = 0.75$ )  
328 postintervention assessment (Table 3, Fig. 4).  
329

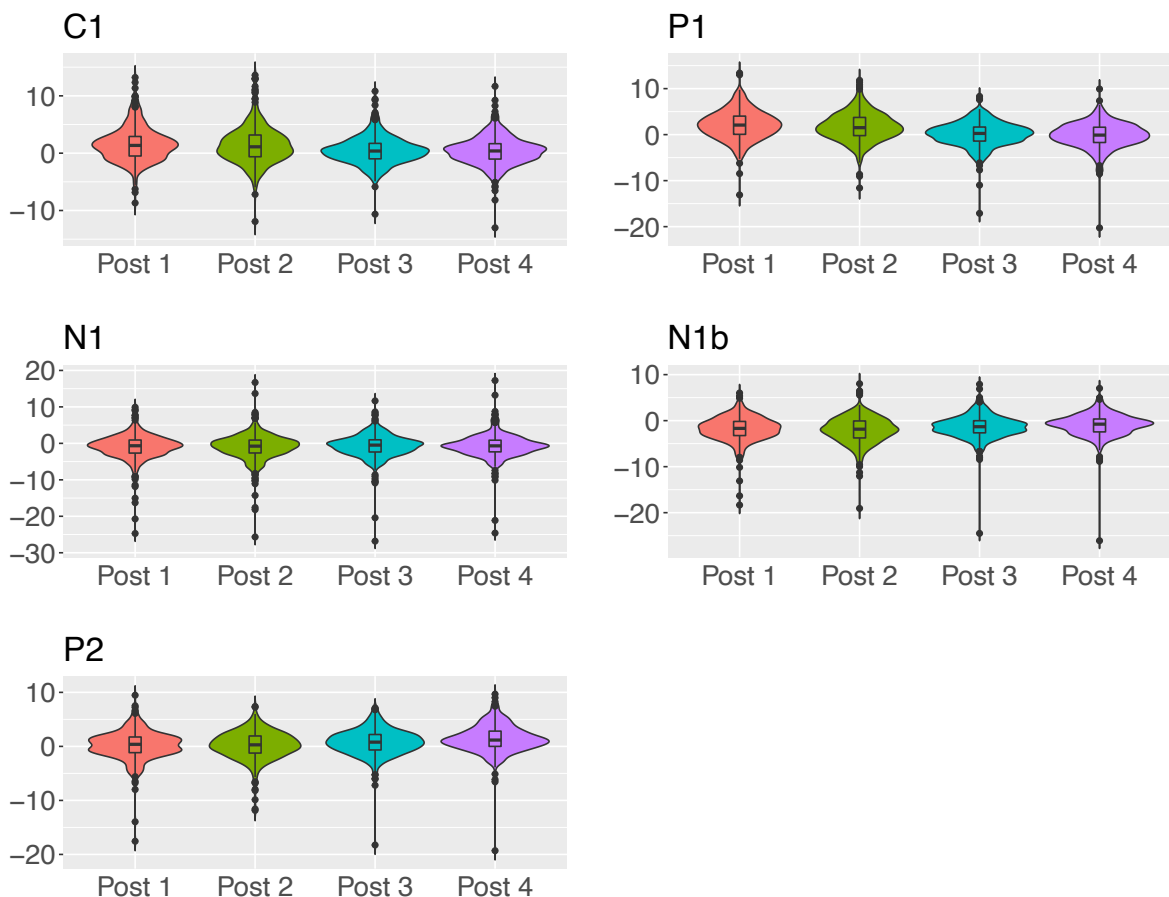

330

331 **Figure 4.** Distributions of amplitude differences (in  $\mu\text{V}$ ) between baseline and postintervention  
332 assessments post 1 (2-4 min after prolonged visual stimulation), post 2 (6-8 min), post 3 (30-32 min),  
333 and post 4 (54-56 min), for VEP components C1, P1, N1, N1b, and P2 ( $n = 415$ ).  
334



335 The P1-N1 composite exhibited significant modulation at the first ( $d = 0.70$ ,  $rr = 0.80$ ),  
336 second ( $d = 0.60$ ,  $rr = 0.78$ ), and third ( $d = 0.19$ ,  $rr = 0.61$ ), but not the last ( $d = 0.14$ ,  
337  $rr = 0.60$ ) postintervention assessment.

338

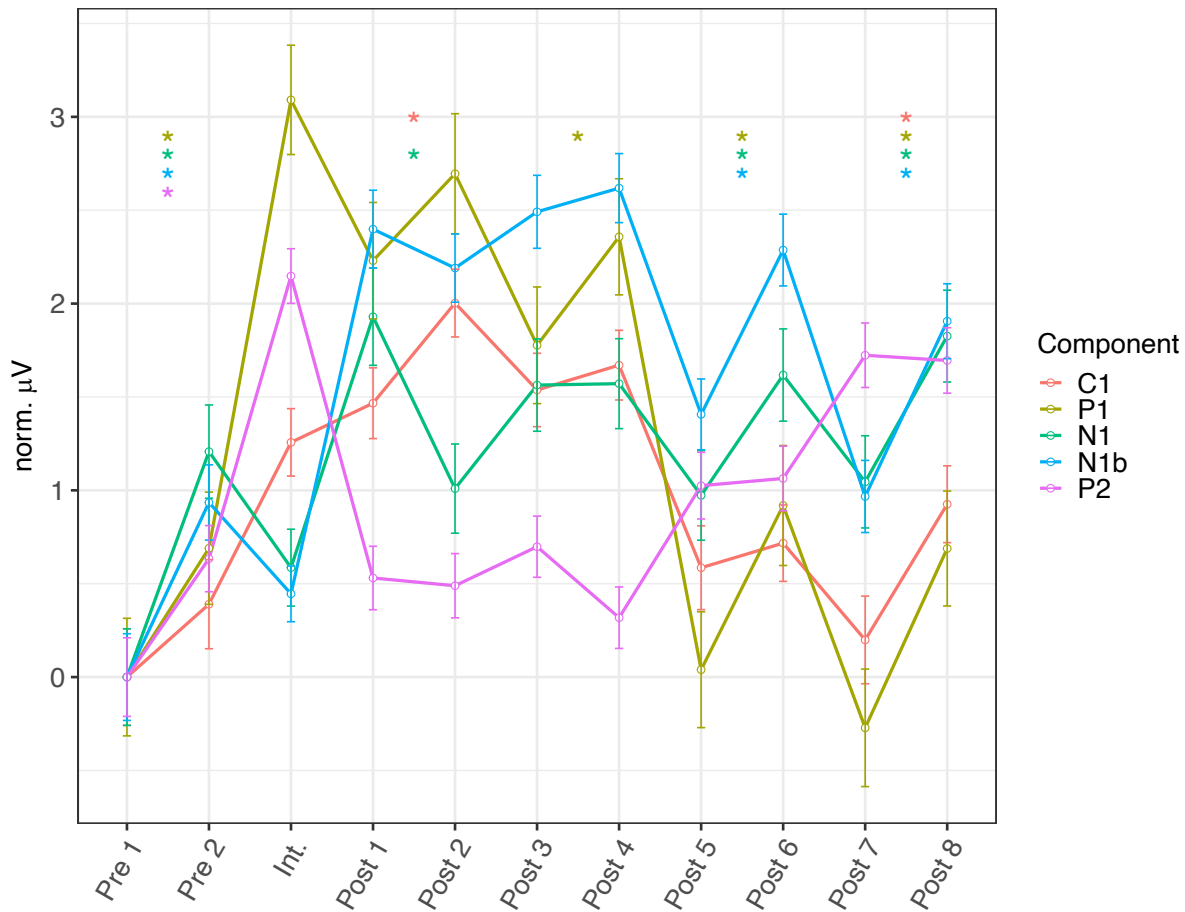

339

340 **Figure 5.** Component amplitudes at separate checkerboard stimulation blocks, normalized to the first  
341 block, with error bars showing standard error of measurement. Asterisks denote significant ( $p <$   
342  $0.0009$ ) amplitude change within assessments (i.e. from pre 1 to pre 2, from post 1 to post 2, from  
343 post 3 to post 4, from post 5 to post 6, and from post 7 to post 8). **Int.:** Intervention block.

344

345 There were also differences between component amplitudes within assessments  
346 (Fig. 5), with significant changes from the first to the second baseline block for  
347 components P1 ( $d = 0.21$ ), N1 ( $d = -0.39$ ), N1b ( $d = -0.28$ ), and P2 ( $d = 0.17$ ), from  
348 the first to the second postintervention block for components C1 ( $d = 0.18$ ), N1 ( $d =$   
349  $0.24$ ), and from the seventh to the eighth postintervention block for components C1  
350 ( $d = 0.24$ ), P1 ( $d = 0.31$ ), N1 ( $d = -0.19$ ), and N1b ( $d = -0.35$ ). These effects were

351 weaker than effects of the prolonged visual stimulation for components C1 ( $p = 1.2 \times$   
352  $10^{-9}$ ), P1 ( $p = 4.3 \times 10^{-14}$ ), N1 ( $p = 2.4 \times 10^{-4}$ ), and N1b ( $p = 1.1 \times 10^{-15}$ ), but not P2 ( $p$   
353  $= 0.66$ ).

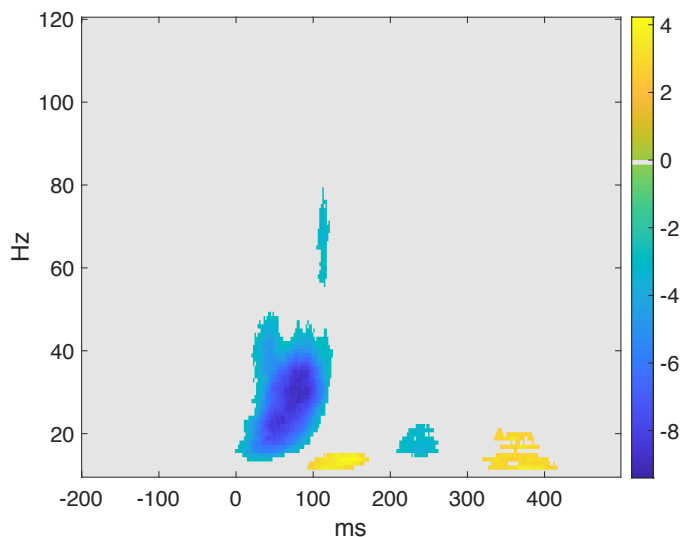

354

355 **Figure 6.** Changes in total power in frequencies 10-120, before to after prolonged visual stimulation,  
356 given as t-scores for each pixel, within significant clusters.  
357

358 The time-frequency analysis exploring the main effect of prolonged visual stimulation  
359 yielded five significant clusters (Fig. 6). Results from analyses across assessments  
360 using individual participants' values averaged within clusters are presented in Table  
361 4. Notably, these revealed that only the first cluster exhibited modulation at all  
362 postintervention assessments, including the first ( $d = -0.48$ ,  $rr = 0.65$ ), second ( $d = -$   
363  $0.60$ ,  $r = 0.72$ ), third ( $d = -0.44$ ,  $rr = 0.66$ ), and fourth ( $d = -0.33$ ,  $rr = 0.65$ ). This  
364 cluster was centered around  $\sim 30$  Hz and  $\sim 70$  ms post-stimulus, and the power  
365 reduction after prolonged visual stimulation was well modeled ( $R^2 = 0.31$ ) by power  
366 changes in a corresponding induced cluster ( $t = 7.22$ ,  $p = 2.7 \times 10^{-12}$ ), C1 modulation  
367 ( $t = -6.57$ ,  $p = 1.7 \times 10^{-10}$ ), and P1 modulation ( $t = 6.43$ ,  $p = 3.8 \times 10^{-10}$ ).

368

369 Correlations across assessments for baseline to postintervention modulation effects  
 370 were moderate, ranging from Spearman's  $\rho = [0.47, 0.69]$  for C1,  $\rho = [0.39, 0.67]$  for  
 371 P1,  $\rho = [0.42, 0.62]$  for N1,  $\rho = [0.44, 0.66]$  for N1b, and  $\rho = [0.47, 0.60]$  for the P2  
 372 component (Fig. 7). All correlations above and including  $r = 0.17$  remained significant  
 373 after multiple comparison correction.

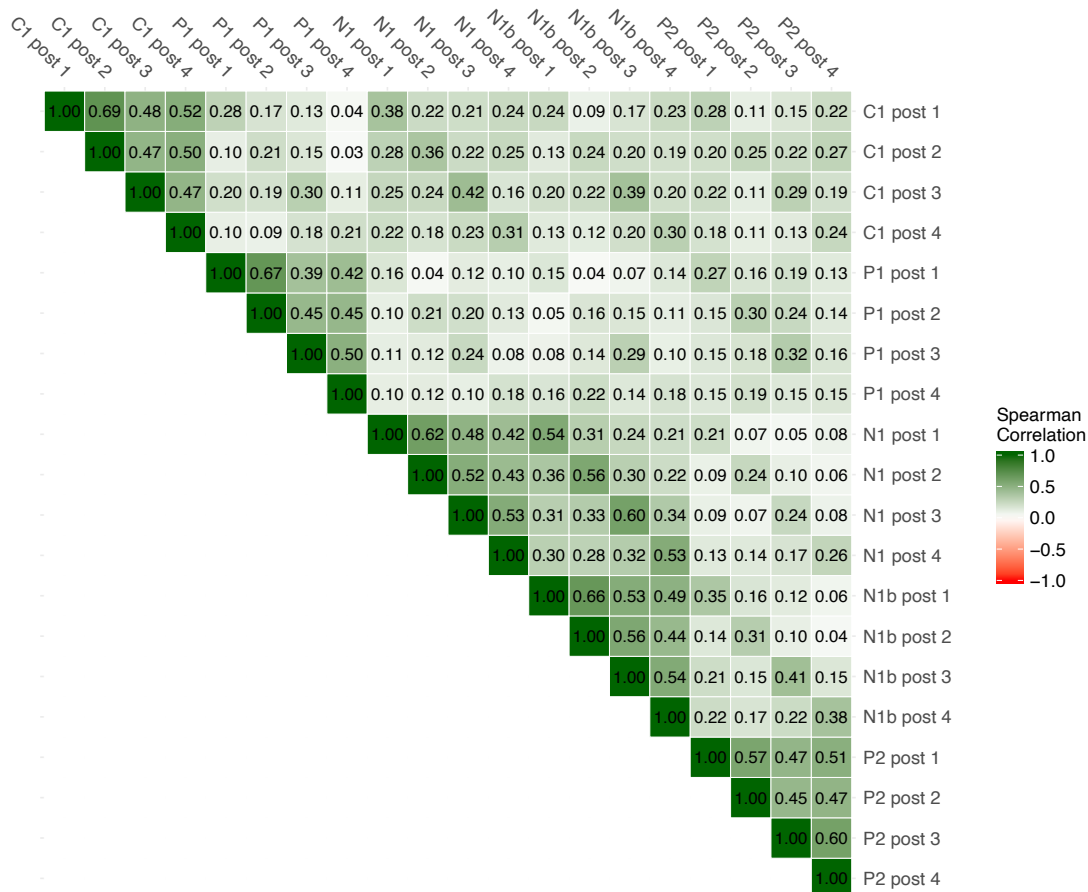

374

375 **Figure 7.** Spearman's  $\rho$  correlations between modulations of VEP components C1, P1, N1, N1b, and  
 376 P2 at postintervention assessments 1-4.

377

378 The regression model for P1 modulation ( $R^2 = 0.15$ ), revealed effects of age ( $t =$   
 379  $5.26, p = 1.6 \times 10^{-7}$ ) and sex ( $t = 3.91, p = 9.7 \times 10^{-5}$ ), with greater modulation for  
 380 older participants and female participants, respectively. The regression model for P2  
 381 modulation ( $R^2 = 0.09$ ) also showed an increased difference from baseline to  
 382 postintervention blocks for female participants ( $t = 5.08, p = 4.3 \times 10^{-7}$ ). The

383 regression model for C1 modulation ( $R^2 = 0.11$ ) revealed an interaction effect of age  
384 and time ( $t = 4.35$ ,  $p = 1.5 \times 10^{-5}$ ), indicating that while the postintervention  
385 modulation for younger participants varied throughout the experiment, this is less the  
386 case for older participants. The regression model for the major time-frequency  
387 component ( $R^2 = 0.03$ ) revealed an effect of age ( $t = -4.56$ ,  $p = 5.7 \times 10^{-6}$ ).  
388 Regression models for N1 ( $R^2 = 0.04$ ) and N1b ( $R^2 = 0.07$ ) modulation did not  
389 provide evidence for effects of age, sex, intervention block alpha power, or  
390 intervention steady state power. Finally, for the attentional task, we only obtained hit  
391 rate data for 45.8% of participants, due to error in the gaming controller. Thus, we  
392 performed a set of control analyses to ensure that the participants for which  
393 attentional data was not obtained did not differ from the participants for which  
394 attentional data was obtained. These showed that there was no difference between  
395 these groups in P1, N1, N1b, or P2 modulation, but only a nominal difference in C1  
396 modulation ( $p = 0.04$ ), and that clear VEPs were evoked for 96% of participants for  
397 which attentional data was not obtained. Among participants for which attentional  
398 data was obtained, the mean hit rate was 98.4%. Together, these results indicate  
399 overall satisfying levels of attention.

400

401

## 402 **Discussion**

403 The current study yielded four main findings. First, we demonstrate robust  
404 experience-dependent modulation of the visual evoked potential in a large sample of  
405 healthy volunteers (n = 415). Second, the retention of this modulation effect over time  
406 varied across VEP components, strongly suggesting that VEP modulation is not a  
407 unitary phenomenon and likely involves several different plasticity mechanisms.  
408 Third, age and sex emerged as significantly associated with some, but not all,  
409 quantifications of VEP modulation, while electrophysiological indices of attention  
410 appeared unrelated to the degree of modulation. Finally, we identify the N1b  
411 component as the most sensitive quantification of both early (2-4 min post-  
412 intervention) and late (54-56 min post-intervention) VEP modulation.

413

414 *Experience-dependent modulation of visual evoked potentials.* At the first and second  
415 postintervention assessments, respectively 2 and 6 minutes after prolonged visual  
416 stimulation, moderate to strong modulation was observed in VEP components C1,  
417 P1, N1, and N1b, as well as in the composite P1-N1. Such experience-dependent  
418 modulations have previously been shown to share many characteristics with LTP,  
419 such as NMDAR-dependence (Frenkel et al., 2006), post-synaptic AMPAR insertion  
420 dependence (Frenkel et al., 2006), and stimulus specificity (McNair et al., 2006; Ross  
421 et al., 2008), and have therefore been regarded as indices of LTP-like cortical  
422 synaptic plasticity. We have shown that the quantifications of VEP modulation that  
423 have previously been described in the literature – modulations of the C1, P1, N1, and  
424 N1b components – coincide with the latencies at which the post-stimulus VEP  
425 exhibited modulation after prolonged visual stimulation in the present study.

426

427 Time-frequency analyses also revealed differences in total power at several latencies  
428 and frequencies, of which only one cluster (~70 ms and ~30 Hz) exhibited effects of  
429 prolonged visual stimulation that were comparable to effects seen on time domain  
430 VEP components. Since these time-frequency modulations were independent of time  
431 domain VEP modulations at comparable latencies, they might reflect neural  
432 dynamics to which time domain VEP modulations are not sensitive.

433

434 *Experience-dependent VEP modulation: retention slopes and correlations.* We  
435 observed differential response patterns between quantifications of VEP modulation,  
436 indicating differences in underlying mechanisms. Retention at the third and fourth  
437 postintervention assessments, i.e., ~30-32 and ~54-56 minutes after prolonged visual  
438 stimulation, was observed for components C1, N1, and N1b. The retention of C1, N1  
439 and N1b modulation at 30 and 54 minutes postintervention is consistent with LTP-like  
440 synaptic processes as underlying mechanisms, since this duration goes beyond the  
441 usual decay of presynaptic short-term potentiation (Citri & Malenka, 2008; Regehr,  
442 2012). Spearman correlations around 0.42-0.52 between C1, N1, and N1b  
443 modulations at 2 and 54-56 minutes postintervention suggest a connection between  
444 early and later modulation effects, which has been established for most forms of  
445 synaptic plasticity (Citri & Malenka, 2008), further corroborating the claim that C1,  
446 N1, and N1b modulations reflect LTP-like cortical plasticity.

447

448 With a sharp voltage increase in the intervention block and subsequent return to near  
449 baseline in the first two postintervention assessments, and renewed amplitude  
450 increases in the third and last postintervention assessments (Fig. 4; Fig. 5), the  
451 response pattern for the P2 component, similar to what has been observed

452 previously (Forsyth, Bachman, Mathalon, Roach, & Asarnow, 2015; Forsyth et al.,  
453 2017), constitutes a clear exception, and appears inconsistent with NMDAR-  
454 dependent LTP, which exhibits a gradual decay (Citri & Malenka, 2008). Along the  
455 same lines, the P2 component appears to lack input specificity (Sumner et al., 2018).  
456 Thus, the effect of time on P2 amplitudes might seem to require some other  
457 mechanism than LTP-like synaptic plasticity. On the other hand, the retention slope  
458 of P1 is consistent with synaptic plasticity as underlying mechanism, although with a  
459 complete decay between 6 and 30 minutes after prolonged visual stimulation, P1  
460 modulation might reflect some short-term plasticity such as post-tetanic potentiation  
461 (Citri & Malenka, 2008).

462

463 *Age and sex modulation of some, but not all, VEP components.* Linear regression  
464 showed a positive main effect of age on P1 modulation, and a positive interaction  
465 effect between age and time after intervention for C1 modulation, but no effects of  
466 age on modulation of either the N1, N1b or the P2 components. These results are in  
467 line with a previous demonstration of robust VEP modulation among older individuals  
468 (de Gobbi-Porto et al., 2015), but seem to contrast with the lack of N1b modulation  
469 previously observed in older participants (Spriggs et al., 2017), and with the more  
470 general decline in neural plasticity associated with aging (Burke & Barnes, 2006).  
471 Further, regression models demonstrated larger P1 modulation, and larger increase  
472 in P2 amplitudes, among female participants, a result that – like the effects of age –  
473 was independent of baseline amplitudes. Together, these results underscore the  
474 need to differentiate between VEP components, and to control for demographic  
475 variables like age and sex, especially in case-control studies of VEP modulation.

476

477 Linear regression models for the effects of age, sex, intervention block alpha power  
478 and steady state power on the modulation of components C1, P1, N1, N1b, and P2  
479 revealed no effects of attentional proxies on any of the quantifications of VEP  
480 modulation, suggesting that participants were sufficiently attentive to the prolonged  
481 visual stimulation for VEP modulation to occur. However, in a previous study of VEP  
482 modulation using 8.7 Hz visual stimulation (Çavuş et al., 2012), intervention block  
483 steady state power was associated with N1b modulation in healthy controls. Although  
484 neural entrainment to visual flickering can occur at frequencies between 1 and at  
485 least 50 Hz, the sensitivity at frequencies around the alpha band is higher than at 2  
486 Hz (Herrmann, 2001), such that our 2 Hz prolonged visual stimulation may have  
487 been too slow for significant entrainment to occur.

488

489 *Robust and enduring modulation of component N1b.* Our quantifications of VEP  
490 modulation seem to be relatively specific in that they exhibit distinct effects, retention  
491 slopes and associations with age and sex. Modulation of the N1b component after  
492 prolonged visual stimulation was overall the strongest effect. Effect size differences,  
493 relatively high correlations, and comparable associations with age and sex between  
494 components N1 and N1b suggest that N1b operationalizations might be preferable,  
495 at least under conditions similar to those present in this study. Although some  
496 observed effects of time might have been caused by other experimental  
497 characteristics than the prolonged visual stimulation, the N1b component has  
498 repeatedly been shown to increase in amplitude with high frequency visual  
499 stimulation, and not without (Teyler et al., 2005), and not with visual stimulation of a  
500 different orientation (Ross et al., 2008) or spatial frequency (McNair et al., 2006),



501 supporting the notion that at least N1b modulation is due to the high frequency or  
502 prolonged visual stimulation.

503

504 *Possible influence of postintervention blocks on retention.* In the present study we  
505 observed modulation of components P1, N1, N1b, and P2 even between blocks of  
506 short duration checkerboard stimulation. Thus, there is reason to question whether  
507 the retention, especially for components N1 and N1b which exhibit long duration  
508 modulation, could have been increased by the postintervention stimulus blocks.  
509 Postintervention blocks have been shown to decrease retention of N1b modulation  
510 (Teyler et al., 2005), but with frequency differences between intervention and  
511 postintervention blocks that were greater than in the present study, so some  
512 influence in favor of retention cannot be ruled out with the present data.

513

514 *Conclusion.* The results of the current study show robust modulation after prolonged  
515 visual stimulation of VEP components C1, P1, N1, and N1b, as well as of ~30 Hz  
516 power at ~70 ms post-stimulus. Moreover, we observed differential retention slopes,  
517 effect sizes, and associations to age and sex for the modulation of VEP components,  
518 strongly suggesting that VEP modulation is not a unitary phenomenon. Taken  
519 together with results from a series of invasive studies in rodents, our current results  
520 support the use of prolonged visual stimulation induced VEP modulation, and  
521 especially N1b modulation, as a robust, non-invasive index of LTP-like cortical  
522 plasticity in humans.

## 523 References

- 524 Abuleil D., McCulloch D. L., Thompson B. (2019). Older Adults Exhibit Greater Visual  
525 Cortex Inhibition and Reduced Visual Cortex Plasticity Compared to Younger  
526 Adults. *Frontiers in Neuroscience*, 13:607.
- 527 Belouchrani, A., Abed-Meraim, K., Cardoso, J. F., & Moulines, E. (1993). Second  
528 order blind separation of temporally correlated sources. *Proceedings of the*  
529 *International Conference on Digital Signal Processing*, 346–351.
- 530 Bigdely-Shamlo, N., Mullen, T., Kothe, C., Su, K.-M., & Robbins, K. A. (2015). The  
531 PREP pipeline: standardized preprocessing for large-scale EEG analysis.  
532 *Frontiers in Neuroinformatics*, 9, B153. <http://doi.org/10.3389/fninf.2015.00016>
- 533 Burke, S. N., & Barnes, C. A. (2006). Neural plasticity in the ageing brain. *Nature*  
534 *Reviews Neuroscience*, 7(1), 30–40. <http://doi.org/10.1038/nrn1809>
- 535 Chaumon, M., Bishop, D. V. M., & Busch, N. A. (2015). A practical guide to the  
536 selection of independent components of the electroencephalogram for artifact  
537 correction. *Journal of Neuroscience Methods*, 250, 47–63.  
538 <http://doi.org/10.1016/j.jneumeth.2015.02.025>
- 539 Citri, A., & Malenka, R. C. (2008). Synaptic Plasticity: Multiple Forms, Functions, and  
540 Mechanisms. *Neuropsychopharmacology*, 33(1), 18–41.  
541 <http://doi.org/10.1038/sj.npp.1301559>
- 542 Cohen, J. (1988). *Statistical Power Analysis for the Behavioral Sciences*. Lawrence  
543 Erlbaum Associates.
- 544 Cohen, M. X. (2014). *Analyzing neural time series data: Theory and practice*. MIT.
- 545 Cooke, S. F., & Bear, M. F. (2012). Stimulus-Selective Response Plasticity in the  
546 Visual Cortex: An Assay for the Assessment of Pathophysiology and Treatment  
547 of Cognitive Impairment Associated with Psychiatric Disorders. *Biological*  
548 *Psychiatry*, 71(6), 487–495. <http://doi.org/10.1016/j.biopsych.2011.09.006>
- 549 Çavuş, I., Reinhart, R. M. G., Roach, B. J., Gueorguieva, R., Teyler, T. J., Clapp, W.  
550 C., et al. (2012). Impaired Visual Cortical Plasticity in Schizophrenia. *Biological*  
551 *Psychiatry*, 71(6), 512–520. <http://doi.org/10.1016/j.biopsych.2012.01.013>
- 552 Delorme, A., & Makeig, S. (2004). EEGLAB: an open source toolbox for analysis of  
553 single-trial EEG dynamics including independent component analysis. *Journal of*  
554 *Neuroscience Methods*, 134(1), 9–21.  
555 <http://doi.org/10.1016/j.jneumeth.2003.10.009>
- 556 Di Russo, F., Martínez, A., Sereno, M. I., Pitzalis, S., & Hillyard, S. A. (2002). Cortical  
557 sources of the early components of the visual evoked potential. *Human Brain*  
558 *Mapping*, 15(2), 95–111. <http://doi.org/10.1002/hbm.10010>
- 559 Elvsåshagen, T., Moberget, T., Bøen, E., Boye, B., Englin, N. O. A., Pedersen, P. Ø.,  
560 et al. (2012). Evidence for Impaired Neocortical Synaptic Plasticity in Bipolar II  
561 Disorder. *Biological Psychiatry*, 71(1), 68–74.  
562 <http://doi.org/10.1016/j.biopsych.2011.09.026>
- 563 Forsyth, J. K., Bachman, P., Mathalon, D. H., Roach, B. J., & Asarnow, R. F. (2015).  
564 Augmenting NMDA receptor signaling boosts experience-dependent  
565 neuroplasticity in the adult human brain. *Proceedings of the National Academy of*  
566 *Sciences*, 112(50), 15331–15336. <http://doi.org/10.1073/pnas.1509262112>
- 567 Forsyth J.K., Bachman P., Mathalon D.H., Roach B.J., Ye E., Asarnow R.F. (2017).  
568 Effects of Augmenting N-Methyl-D-Aspartate Receptor Signaling on Working  
569 Memory and Experience-Dependent Plasticity in Schizophrenia: An Exploratory  
570 Study Using Acute d-cycloserine. *Schizophrenia Bulletin*, 43(5):1123–33.

- 571 Frenkel, M. Y., Sawtell, N. B., Diogo, A. C. M., Yoon, B., Neve, R. L., & Bear, M. F.  
572 (2006). Instructive Effect of Visual Experience in Mouse Visual Cortex, *51*(3),  
573 339–349. <http://doi.org/10.1016/j.neuron.2006.06.026>
- 574 Graham, F. K., & Murray, G. M. (1977). Discordant effects of weak prestimulation on  
575 magnitude and latency of the reflex blink. *Physiological Psychology*, *5*(1), 108–  
576 114.
- 577 Herrmann, C. S. (2001). Human EEG responses to 1-100 Hz flicker: resonance  
578 phenomena in visual cortex and their potential correlation to cognitive  
579 phenomena. *Experimental Brain Research*, *137*(3-4), 346–353.  
580 <http://doi.org/10.1007/s002210100682>
- 581 Ioannidis, J. P. A. (2008). Why Most Discovered True Associations Are Inflated.  
582 *Epidemiology*, *19*(5), 640–648. <http://doi.org/10.1097/EDE.0b013e31818131e7>
- 583 Jahshan, C., Wynn, J. K., Mathalon, D. H., & Green, M. F. (2017). Cognitive  
584 correlates of visual neural plasticity in schizophrenia. *Schizophrenia Research*.  
585 <http://doi.org/10.1016/j.schres.2017.03.016>
- 586 de Gobbi-Porto, F. H., Fox, A. M., Tusch, E. S., Sorond, F., Mohammed, A. H., &  
587 Daffner, K. R. (2015). In vivo evidence for neuroplasticity in older adults. *Brain*  
588 *Research Bulletin*, *114*, 56–61.  
589 <http://doi.org/10.1016/j.brainresbull.2015.03.004>
- 590 Klöppel, S., Lauer, E., Peter, J.,  
591 Minkova, L., Nissen, C., Normann, C., et al. (2015). LTP-like plasticity in the  
592 visual system and in the motor system appear related in young and healthy  
593 subjects. *Frontiers in Human Neuroscience*, *9*(695), 230.  
594 <http://doi.org/10.3389/fnhum.2015.00506>
- 595 Li, J., & Ji, L. (2005). Adjusting multiple testing in multilocus analyses using the  
596 eigenvalues of a correlation matrix. *Heredity*, *95*(3), 221–227.  
597 <http://doi.org/10.1038/sj.hdy.6800717>
- 598 Lisman, J. (2017). Glutamatergic synapses are structurally and biochemically  
599 complex because of multiple plasticity processes: long-term potentiation, long-  
600 term depression, short-term potentiation and scaling. *Philosophical Transactions*  
601 *of the Royal Society of London. Series B, Biological Sciences*, *372*(1715),  
20160260. <http://doi.org/10.1098/rstb.2016.0260>
- 602 Liu, N.-H., Chiang, C.-Y., & Chu, H.-C. (2013). Recognizing the degree of human  
603 attention using EEG signals from mobile sensors. *Sensors (Basel, Switzerland)*,  
604 *13*(8), 10273–10286.
- 605 Luders, E., Narr, K. L., Thompson, P. M., Rex, D. E., Jancke, L., Steinmetz, H., &  
606 Toga, A. W. (2004). Gender differences in cortical complexity, *7*(8), 799–800.  
607 <http://doi.org/10.1038/nn1277>
- 608 McNair, N. A., Clapp, W. C., Hamm, J. P., Teyler, T. J., Corballis, M. C., & Kirk, I. J.  
609 (2006). Spatial frequency-specific potentiation of human visual-evoked potentials.  
610 *NeuroReport*, *17*(7), 739–741.  
611 <http://doi.org/10.1097/01.wnr.0000215775.53732.9f>
- 612 Näätänen, R., Gaillard, A. W. K., & Mäntysalo, S. (1978). Early selective-attention  
613 effect on evoked potential reinterpreted. *Acta Psychologica*, *42*(4), 313–329.
- 614 Normann, C., Schmitz, D., Fürmaier, A., Döing, C., & Bach, M. (2007). Long-Term  
615 Plasticity of Visually Evoked Potentials in Humans is Altered in Major Depression.  
616 *Biological Psychiatry*, *62*(5), 373–380.  
617 <http://doi.org/10.1016/j.biopsych.2006.10.006>
- 618 R Core Team. (2019). R: A Language and Environment for Statistical Computing.

- 619 Regehr, W. G. (2012). Short-Term Presynaptic Plasticity. *Cold Spring Harbor*  
620 *Perspectives in Biology*, 4(7), a005702–a005702.  
621 <http://doi.org/10.1101/cshperspect.a005702>
- 622 Ross, R. M., McNair, N. A., Fairhall, S. L., Clapp, W. C., Hamm, J. P., Teyler, T. J., &  
623 Kirk, I. J. (2008). Induction of orientation-specific LTP-like changes in human  
624 visual evoked potentials by rapid sensory stimulation. *Brain Research Bulletin*,  
625 76(1-2), 97–101. <http://doi.org/10.1016/j.brainresbull.2008.01.021>
- 626 Smallwood, N. (2015). Influence of Physical Activity on Human Sensory Long-Term  
627 Potentiation. *Doi.org*, 1–10. <http://doi.org/10.1017/S1355617715001095>
- 628 Schizophrenia Working Group of the Psychiatric Genomics Consortium (2014).  
629 Biological insights from 108 schizophrenia-associated genetic loci. *Nature*,  
630 511(7510), 421–427. <http://doi.org/10.1038/nature13595>
- 631 Spriggs, M. J., Cadwallader, C. J., Hamm, J. P., Tippett, L. J., & Kirk, I. J. (2017).  
632 Age-related alterations in human neocortical plasticity. *Brain Research Bulletin*,  
633 130, 53–59. <http://doi.org/10.1016/j.brainresbull.2016.12.015>
- 634 Spriggs, M. J., Sumner, R. L., McMillan, R. L., Moran, R. J., Kirk, I. J., &  
635 Muthukumaraswamy, S. D. (2018). Indexing sensory plasticity: Evidence for  
636 distinct Predictive Coding and Hebbian learning mechanisms in the cerebral  
637 cortex. *NeuroImage*, 176, 290–300.  
638 <http://doi.org/10.1016/j.neuroimage.2018.04.060>
- 639 Spriggs, M. J., Thompson, C. S., Moreau, D., McNair, N. A., Wu, C. C., Lamb, Y. N.,  
640 et al. (2019). Human Sensory LTP Predicts Memory Performance and Is  
641 Modulated by the BDNF Val66Met Polymorphism. *Frontiers in Human*  
642 *Neuroscience*, 13, 387. <http://doi.org/10.3389/fnhum.2019.00022>
- 643 Stephan, K. E., Baldeweg, T., & Friston, K. J. (2006). Synaptic Plasticity and  
644 Dysconnection in Schizophrenia. *Biological Psychiatry*, 59(10), 929–939.  
645 <http://doi.org/10.1016/j.biopsych.2005.10.005>
- 646 Sumner, R. L., Spriggs, M. J., McMillan, R. L., Sundram, F., Kirk, I. J., &  
647 Muthukumaraswamy, S. D. (2018). Neural plasticity is modified over the human  
648 menstrual cycle: Combined insight from sensory evoked potential LTP and  
649 repetition suppression. *Neurobiology of Learning and Memory*, 155, 422–434.
- 650 Takeuchi, T., Duzkiewicz, A. J., & Morris, R. G. M. (2013). The synaptic plasticity  
651 and memory hypothesis: encoding, storage and persistence. *Philosophical*  
652 *Transactions of the Royal Society of London. Series B, Biological Sciences*,  
653 369(1633), 20130288–20130288.
- 654 Teyler, T. J., Hamm, J. P., Clapp, W. C., Johnson, B. W., Corballis, M. C., & Kirk, I. J.  
655 (2005). Long-term potentiation of human visual evoked responses. *European*  
656 *Journal of Neuroscience*, 21(7), 2045–2050. [http://doi.org/10.1111/j.1460-](http://doi.org/10.1111/j.1460-9568.2005.04007.x)  
657 [9568.2005.04007.x](http://doi.org/10.1111/j.1460-9568.2005.04007.x)
- 658 Wynn, J. K., Roach, B. J., McCleery, A., Marder, S. R., Mathalon, D. H., & Green, M.  
659 F. (2019). Evaluating visual neuroplasticity with EEG in schizophrenia  
660 outpatients. *Schizophrenia Research*. <http://doi.org/10.1016/j.schres.2019.08.015>
- 661 Zak, N., Moberget, T., Bøen, E., Boye, B., Waage, T. R., Dietrichs, E., et al. (2018).  
662 Longitudinal and cross-sectional investigations of long-term potentiation-like  
663 cortical plasticity in bipolar disorder type II and healthy individuals. *Translational*  
664 *Psychiatry*, 8(1), 476–103. <http://doi.org/10.1038/s41398-018-0151-5>  
665

666 **Tables**

667

668 **Table 1: Overview of VEP modulation studies**

669

| <i>Author, year<sup>a</sup></i>    | <i>N<sup>b</sup></i> | <i>Intervention</i>               | <i>Modulation<sup>c</sup></i>                        |
|------------------------------------|----------------------|-----------------------------------|------------------------------------------------------|
| <i>Teyler et al., 2005</i>         | 6                    | 2 min 9 Hz checkerboard           | N1b <sup>↓</sup>                                     |
| <i>McNair et al., 2006</i>         | 10                   | 2 min 8.6 Hz grating              | N1b <sup>↓</sup>                                     |
| <i>Normann et al., 2007</i>        | 32                   | 10 min 2 Hz checkerboard          | C1 <sup>↑</sup> , P1 <sup>↑</sup> , N1 <sup>↓</sup>  |
| <i>Ross et al., 2008</i>           | 18                   | 2 min 8.6 Hz grating              | N1b <sup>↓</sup>                                     |
| <i>Çavuş et al., 2012</i>          | 41                   | 2 min 8.87 Hz checkerboard        | C1 <sup>↓</sup> , N1b <sup>↓</sup>                   |
| <i>Elvsåshagen et al., 2012</i>    | 66                   | 10 min 2 Hz checkerboard          | P1 <sup>↑</sup> , N1 <sup>↓</sup>                    |
| <i>Forsyth et al., 2015</i>        | 65                   | 2 min 8.87 Hz checkerboard        | C1 <sup>↑</sup> , P2 <sup>↑</sup>                    |
| <i>de Gobbi-Porto et al., 2015</i> | 17                   | 2 min 9 Hz checkerboard           | N1b <sup>↓</sup>                                     |
| <i>Klöppel et al., 2015</i>        | 37                   | 10 min 2 Hz checkerboard          | C1 <sup>↑</sup> , P1 <sup>↑</sup>                    |
| <i>Smallwood et al., 2015</i>      | 21                   | 2 min 8.6 Hz grating              | N1b <sup>↓</sup>                                     |
| <i>Forsyth et al., 2017</i>        | 45                   | 2 min 8.87 Hz checkerboard        | C1 <sup>↑</sup> , P2 <sup>↑</sup>                    |
| <i>Jahsan et al., 2017</i>         | 64                   | 2 min 8.87 Hz checkerboard        | N1b <sup>↓</sup> , P2 <sup>↑</sup>                   |
| <i>Spriggs et al., 2017</i>        | 49                   | 2 min 8.6 Hz grating              | N1b <sup>↓</sup> , P2a <sup>↑</sup>                  |
| <i>Spriggs et al., 2018</i>        | 40                   | 2 min 9 Hz grating                | C1 <sup>↓</sup> , N1 <sup>↑</sup> , P2 <sup>↑</sup>  |
| <i>Sumner et al., 2018</i>         | 20                   | 2 min 9 Hz grating                | P2 <sup>↑</sup>                                      |
| <i>Zak et al., 2018</i>            | 58                   | 10 min 2 Hz checkerboard          | C1 <sup>↑</sup> , P1 <sup>↑</sup> , N1 <sup>↓</sup>  |
| <i>Abuleil et al., 2019</i>        | 47                   | 2 min 9 Hz checkerboard           | P1 <sup>↓</sup> , N1b <sup>↓</sup>                   |
| <i>Spriggs et al., 2019</i>        | 28                   | 2 min 8.6 Hz grating              | N1b <sup>↓</sup>                                     |
| <i>Wynn et al., 2019</i>           | 65                   | 4 min of 10 Hz grating, on/off 5s | P1 <sup>↓</sup> , N1b <sup>↑</sup> , P2 <sup>↑</sup> |

670 Table of studies using high frequency or prolonged visual stimulation to manipulate visual  
 671 evoked potentials in humans.<sup>a</sup> Details in references. <sup>b</sup> Results for some participants may have  
 672 been reported in more than one paper. <sup>c</sup> Due to differing methods of analysis between  
 673 studies, the exact nature of the modulated components can vary, and due to differences in  
 674 statistical analysis between studies, the probability of actual modulation having been  
 675 observed can also vary. Arrows denote direction of change pre-post intervention in the  
 676 amplitude of a component (e.g. an upward arrow for a component that is negative at baseline  
 677 means that the component became less negative or even positive after intervention).

678

679

680

681

682

683

684

685 **Table 2: VEP component amplitudes and latencies at baseline**

686

| <i>Component</i> | <i>Latency (ms)</i> | <i>Amplitude (μV)</i> |
|------------------|---------------------|-----------------------|
| <i>C1</i>        | 66.6±0.51           | -3.91±0.24            |
| <i>P1</i>        | 99.0±0.41           | 8.42±0.30             |
| <i>N1</i>        | 140.3±0.81          | -5.92±0.24            |
| <i>N1b</i>       | NA                  | -1.65±0.20            |
| <i>P2</i>        | NA                  | 1.41±0.17             |

687 Table of VEP component amplitudes and latencies at baseline, measured at the occiput (Oz)  
 688 with anterior reference (AFz). **NA**: not applicable.



689  
690  
691

**Table 3: VEP component modulation after prolonged visual stimulation**

|               |                | <i>C1</i>           | <i>P1</i>           | <i>N1</i>           | <i>N1b</i>          | <i>P2</i>           |
|---------------|----------------|---------------------|---------------------|---------------------|---------------------|---------------------|
| <i>Post 1</i> | <i>d</i>       | 0.53                | 0.66                | -0.27               | -0.66               | 0.08                |
| (2-4          | <i>rr</i>      | 0.70                | 0.76                | 0.62                | 0.77                | 0.53                |
| <i>min</i> )  | <i>p</i>       | <5*10 <sup>-5</sup> | <5*10 <sup>-5</sup> | <5*10 <sup>-5</sup> | <5*10 <sup>-5</sup> | 0.10                |
|               | <i>-log(p)</i> | 23.1                | 33.7                | 7.1                 | 33.7                | 1                   |
| <i>Post 2</i> | <i>d</i>       | 0.44                | 0.55                | -0.26               | -0.71               | 0.08                |
| (6-8          | <i>rr</i>      | 0.67                | 0.72                | 0.61                | 0.77                | 0.54                |
| <i>min</i> )  | <i>p</i>       | <5*10 <sup>-5</sup> | <5*10 <sup>-5</sup> | <5*10 <sup>-5</sup> | <5*10 <sup>-5</sup> | 0.10                |
|               | <i>-log(p)</i> | 16.9                | 24.6                | 6.8                 | 37.8                | 1                   |
| <i>Post 3</i> | <i>d</i>       | 0.20                | 0.04                | -0.17               | -0.53               | 0.30                |
| (30-32        | <i>rr</i>      | 0.58                | 0.54                | 0.60                | 0.75                | 0.65                |
| <i>min</i> )  | <i>p</i>       | <5*10 <sup>-5</sup> | 0.38                | 0.0003              | <5*10 <sup>-5</sup> | <5*10 <sup>-5</sup> |
|               | <i>-log(p)</i> | 4.16                | 0.4                 | 3.2                 | 23.0                | 8.9                 |
| <i>Post 4</i> | <i>d</i>       | 0.16                | -0.06               | -0.21               | -0.38               | 0.54                |
| (54-56        | <i>rr</i>      | 0.56                | 0.48                | 0.66                | 0.68                | 0.75                |
| <i>min</i> )  | <i>p</i>       | 0.001               | 0.22                | <5*10 <sup>-5</sup> | <5*10 <sup>-5</sup> | <5*10 <sup>-5</sup> |
|               | <i>-log(p)</i> | 2.9                 | 0.7                 | 4.8                 | 12.9                | 24.3                |

692 Table of VEP component modulation after prolonged visual stimulation. **d**: Cohen's *d*, **rr**:  
693 response rate, **p**: p-value after 20000 permutations, **-log(p)**: negative decimal logarithm of t-  
694 test p-value (for illustration, not all modulations are normally distributed).  
695

696 **Table 4: Cluster power modulation after prolonged visual stimulation**

697

|               |                 | <i>A1</i>           | <i>A2</i>           | <i>A3</i>          | <i>A4</i>           | <i>A5</i> | <i>I1</i>           |
|---------------|-----------------|---------------------|---------------------|--------------------|---------------------|-----------|---------------------|
| <i>Post 1</i> | <i>d</i>        | -0.48               | 0.19                | -0.19              | 0.17                | -0.16     | -0.34               |
| (2-4          | <i>rr</i>       | 0.65                | 0.56                | 0.58               | 0.59                | 0.54      | 0.62                |
| <i>min</i> )  | <i>p</i>        | <5*10 <sup>-5</sup> | 0.0001              | 0.0001             | 0.0004              | 0.001     | <5*10 <sup>-5</sup> |
|               | <i>-log(p*)</i> | 19.9                | 4.1                 | 4.2                | 3.4                 | 3.0       | 11.0                |
| <i>Post 2</i> | <i>d</i>        | -0.60               | 0.35                | -0.09              | 0.06                | -0.16     | -0.41               |
| (6-8          | <i>rr</i>       | 0.72                | 0.62                | 0.53               | 0.53                | 0.56      | 0.65                |
| <i>min</i> )  | <i>p</i>        | <5*10 <sup>-5</sup> | <5*10 <sup>-5</sup> | 0.06               | 0.23                | 0.0001    | <5*10 <sup>-5</sup> |
|               | <i>-log(p*)</i> | 28.5                | 11.1                | 1.2                | 0.64                | 2.9       | 15.2                |
| <i>Post 3</i> | <i>d</i>        | -0.44               | 0.09                | -0.20              | -0.36               | -0.12     | -0.30               |
| (30-32        | <i>rr</i>       | 0.66                | 0.53                | 0.55               | 0.65                | 0.55      | 0.61                |
| <i>min</i> )  | <i>p</i>        | <5*10 <sup>-5</sup> | 0.056               | 5*10 <sup>-5</sup> | <5*10 <sup>-5</sup> | 0.015     | <5*10 <sup>-5</sup> |
|               | <i>-log(p*)</i> | 17.2                | 1.3                 | 4.1                | 11.7                | 1.8       | 8.7                 |
| <i>Post 4</i> | <i>d</i>        | -0.33               | 0.15                | -0.18              | -0.28               | -0.17     | -0.18               |
| (54-56        | <i>rr</i>       | 0.65                | 0.57                | 0.59               | 0.62                | 0.55      | 0.57                |
| <i>min</i> )  | <i>p</i>        | <5*10 <sup>-5</sup> | 0.003               | 0.0001             | <5*10 <sup>-5</sup> | 0.001     | 0.0004              |
|               | <i>-log(p*)</i> | 10.4                | 2.5                 | 3.7                | 7.8                 | 3.1       | 3.4                 |

698 Table of cluster power modulations after prolonged visual stimulation. **d**: Cohen's *d*, **rr**:  
699 response rate, **p**: p-value after 20000 permutations, **-log(p)**: negative decimal logarithm of t-  
700 test p-value (for illustration, not all potentiations are normally distributed), **A1-5**: Cluster  
701 absolute power, **I1**: Induced power in the first cluster.
